# Supplementary material
Source: publisher figshare collection journal article supplement (https://frontiersin.figshare.com/ndownloader/files/29036862)
Supplement: Supplementary file [file 29036862]

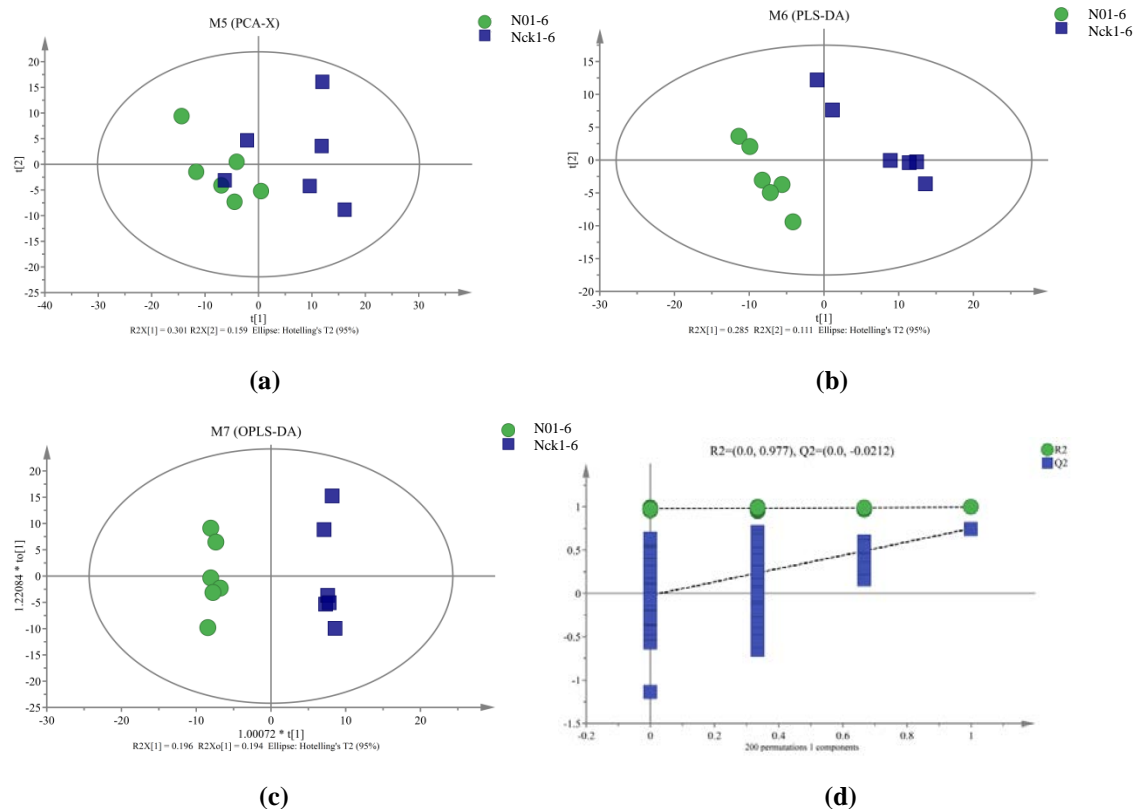

Supplementary Figure S1 Scores plot of multivariate statistical analysis of accumulated metabolites in N0 and Nck. (a) Principal component analysis (PCA); (b) Partial least squares discriminant analysis (PLS-DA); (c) Orthogonal partial least squares discriminant analysis (OPLS-DA); (d) Response permutation test (RPT) of OPLS-DA model. The X-axis of the PCA score graph represented the first principal component PC1, which was showed with  $t[1]$ . The Y-axis represented the second principal component PC2, which was showed with  $t[2]$ . N01-6 and Nck1-6 sampling replicates of grains from 6 individual plants. In the score plot, the separation degree of samples from different group can explain the metabolites differences of each group.

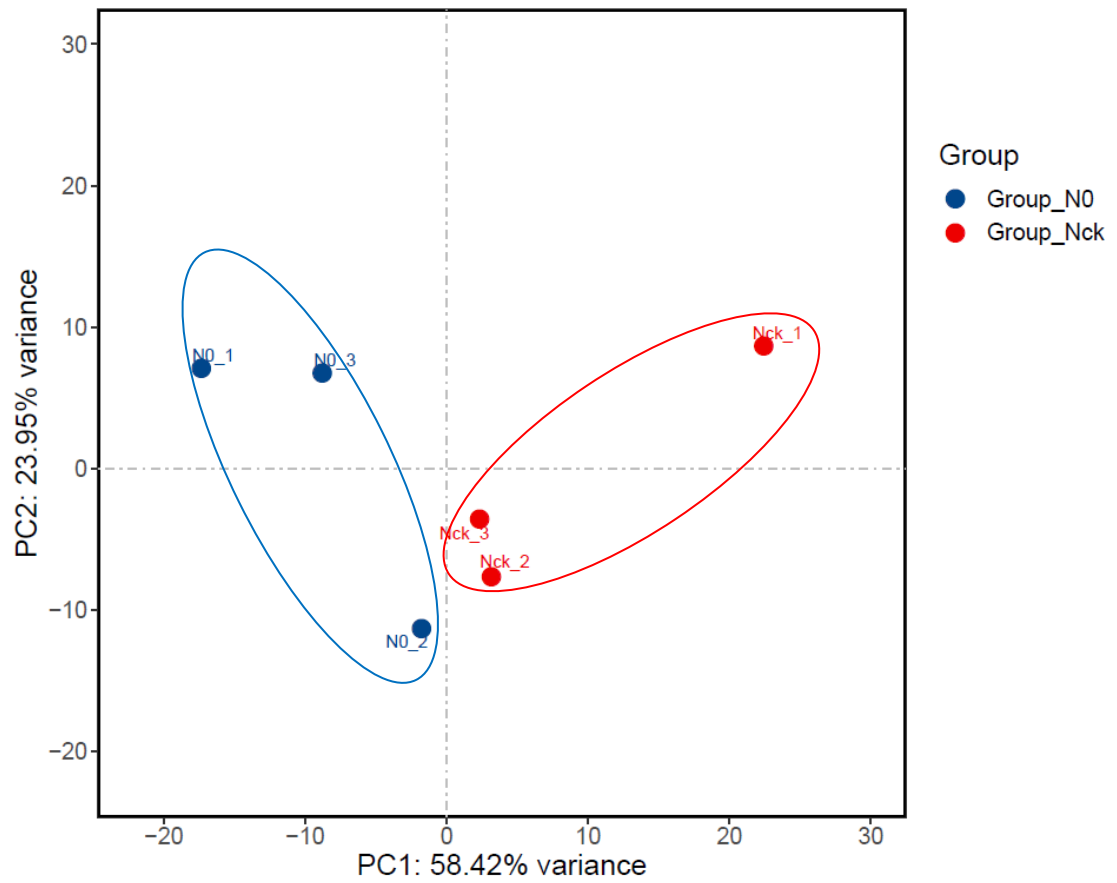

Supplementary Figure S2 Principal component analysis (PCA) of RNA-seq expression in N0 (N-deficient) and Nck (N-sufficient) condition based on FPKM

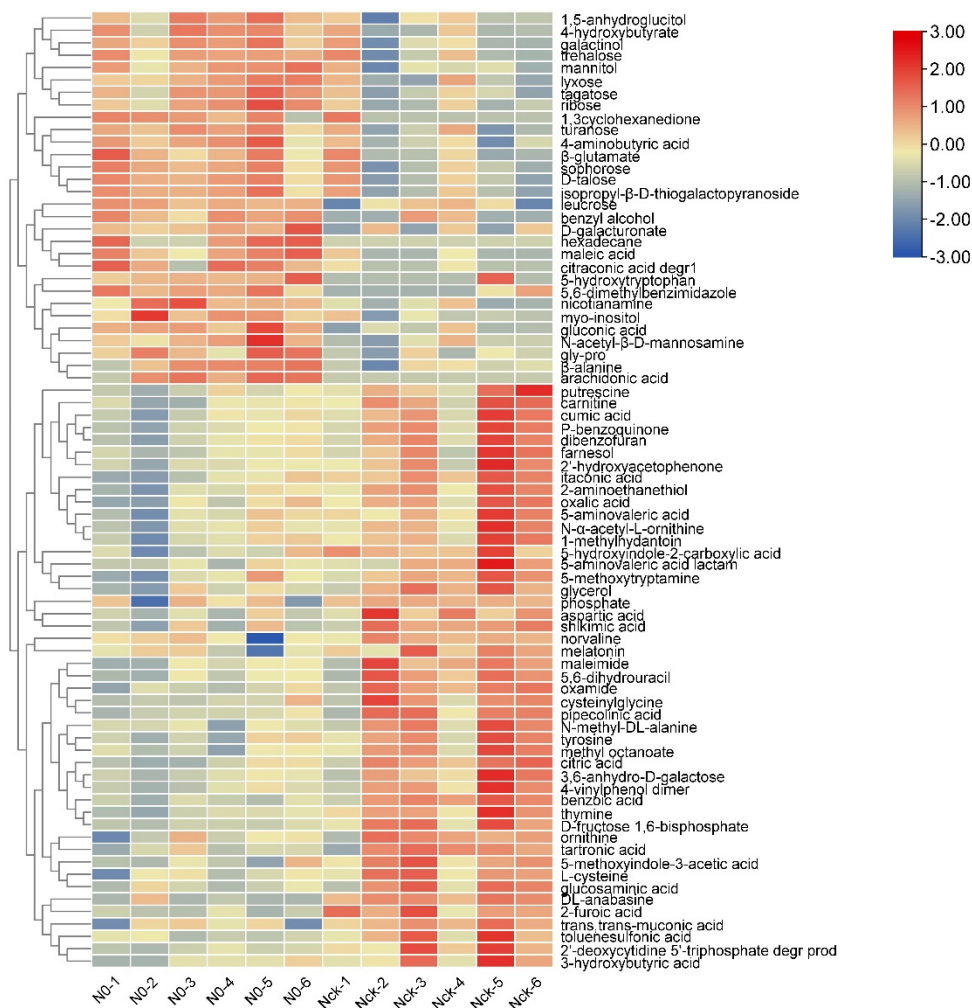

Supplementary Figure S3 The clustering heatmap of content levels for 77 differentially accumulated metabolites (DAMs) under N0 (N-deficient) and Nck (N-sufficient) condition

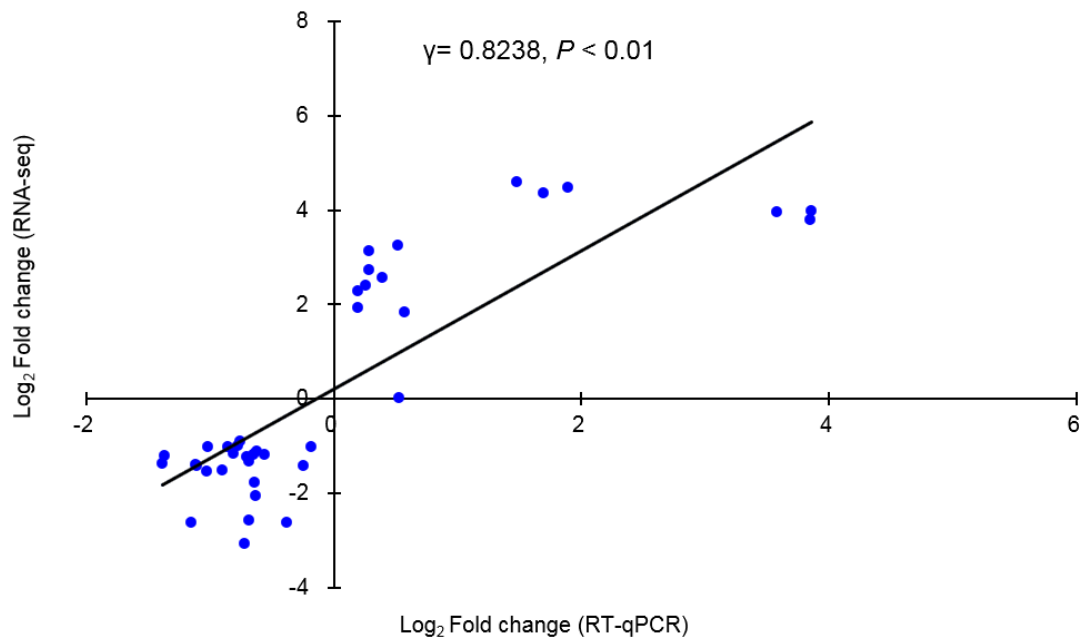

Supplementary Figure S4 Comparison of the log<sub>2</sub> Fold change (Fold change is the value N0/Nck) of 13 selected genes with 3 biological replicates by RNA-seq and RT-qPCR.

**Supplementary Table S1. Primers used in qRT-PCR validation**

| <b>Gene ID</b>                         | <b>Gene Symbol</b> | <b>Forward primer (5-&gt;3)</b> | <b>Reverse primer (5-&gt;3)</b> |
|----------------------------------------|--------------------|---------------------------------|---------------------------------|
| $\beta$ -actin                         | $\beta$ -actin     | TCCAATCTATGAGGGATACACGC         | TCTTCATTAGATTATCCGTGAGGTC       |
| TRIAE_CS42_7AS_TGACv1_569206_AA1810290 | PETE               | AGACCATCACCTTCAAGAAC            | TCCTGGGAGATCTTGGAGAC            |
| TRIAE_CS42_2AL_TGACv1_094363_AA0296470 | PS I-K             | CTCCGGCTCCACAAGATTTA            | GGATTTGTGTGCTGTGGATG            |
| TRIAE_CS42_1DL_TGACv1_062185_AA0210150 | LHBC               | GCCTCGATTACCTTGGAAC             | CTTCAACCAGACCCATGAGA            |
| TRIAE_CS42_2BL_TGACv1_129961_AA0400500 | PORA               | CACCTTCTCCTCGCTTTAC             | CCTTGGTGACGAACCTTCTG            |
| TRIAE_CS42_5DL_TGACv1_437406_AA1466150 | OsI_012078         | GCCCGTAGAGAACCTCTT              | TGGACGGACAGATGGCTTA             |
| TRIAE_CS42_U_TGACv1_712376_AA2166870   | HSFB2A             | TTGACAGGTGGGAGTTCG              | TCCCTTCCGCCTCTGTATC             |
| TRIAE_CS42_4DS_TGACv1_362256_AA1178310 | CBL3               | TTGATAAGACTTTTCGAGGAGGC         | AGGGATGTCTGAGAACTAGAT           |
| TRIAE_CS42_4BL_TGACv1_321697_AA1064240 | HSP70              | AGAACGCCCTGGAGAACTA             | TCTTCTTGTCGGCCTCTG              |
| TRIAE_CS42_U_TGACv1_640819_AA2075640   | PIN9               | TCCAAGGACCTCATGAAGC             | CCGCCATGTACTCGTAGA              |
| TRIAE_CS42_5BL_TGACv1_404843_AA1312530 | mak2               | CAGTCAAGCAGCAAGAGC              | CCTTGGATGCCATGATCAG             |
| TRIAE_CS42_6AL_TGACv1_471593_AA1511550 | WAK5               | CAACTGAAGATGAAGGTCGTG           | AACTTGAACCCTGCGTAG              |
| TRIAE_CS42_3DL_TGACv1_251332_AA0880190 | CDC48C             | AGATACTGGAGAGGCTCAC             | CCAACGCCTTCAAGTCTG              |
| TRIAE_CS42_6BS_TGACv1_515830_AA1672640 | SMC6B              | ATCACACTGTGCTGAATGTAT           | ATGCAAGAGATTTTCCGACT            |

**Supplementary Table S6. 71 DEGs related to ribosome, DNA and RNA activities, as well as cell cycle under N-deficiency stress**

| Group                                   | Gene ID                                | Gene_symbol  | log <sub>2</sub> FC | Regulation | Description                                           |
|-----------------------------------------|----------------------------------------|--------------|---------------------|------------|-------------------------------------------------------|
| Structural<br>constitute of<br>ribosome | TRIAE_CS42_2AL_TGACv1_093370_AA0278710 | RPL4A        | 2.45                | Up         | 60S ribosomal protein L4-1                            |
|                                         | TRIAE_CS42_3DL_TGACv1_250228_AA0864600 | RPL18A       | 1.17                | Up         | 60S ribosomal protein L18-A                           |
|                                         | TRIAE_CS42_3DL_TGACv1_252268_AA0888970 | RPL20        | 2.27                | Up         | 50S ribosomal protein L20, chloroplastic              |
|                                         | TRIAE_CS42_7AL_TGACv1_556923_AA1773360 | TRIUR3_18443 | 1.39                | Up         | hypothetical protein TRIUR3_18443                     |
| Ribosome<br>biogenesis in<br>eukaryotes | TRIAE_CS42_1AL_TGACv1_004995_AA0054460 | MDN1         | 1.96                | Up         | midasin                                               |
|                                         | TRIAE_CS42_2DL_TGACv1_159051_AA0531450 | utp13        | 1.12                | Up         | U3 small nucleolar RNA-associated protein 13          |
|                                         | TRIAE_CS42_3AS_TGACv1_212415_AA0700700 | rio1         | 1.07                | Up         | serine/threonine-protein kinase RIO1                  |
|                                         | TRIAE_CS42_3DL_TGACv1_251332_AA0880190 | CDC48C       | 2.72                | Up         | Cell division control protein 48 homolog C            |
|                                         | TRIAE_CS42_6BL_TGACv1_500458_AA1604970 |              | 1.43                | Up         | uncharacterized protein LOC109783459                  |
|                                         | TRIAE_CS42_6DL_TGACv1_529152_AA1717630 | naf1         | 1.67                | Up         | H/ACA ribonucleoprotein complex non-core subunit NAF1 |
|                                         | TRIAE_CS42_1DL_TGACv1_061207_AA0188840 | NLE1         | 1.35                | Up         | notchless protein homolog                             |
| RNA<br>activities                       | TRIAE_CS42_5BS_TGACv1_423949_AA1385270 | Os03g0625900 | 1.12                | Up         | U3 snoRNP-associated protein-like YAOH                |
|                                         | TRIAE_CS42_1BS_TGACv1_049703_AA0160180 | NUP107       | 1.02                | Up         | nuclear pore complex protein NUP107                   |
|                                         | TRIAE_CS42_7BL_TGACv1_577447_AA1875530 | NUP50A       | 1.24                | Up         | nuclear pore complex protein NUP50A                   |
|                                         | TRIAE_CS42_7DL_TGACv1_605020_AA2003890 | NRPB8B       | 1.93                | Up         | DNA-directed RNA polymerases II, IV and V subunit 8B  |
|                                         | TRIAE_CS42_6DS_TGACv1_543462_AA1740430 | RH10         | 1.70                | Up         | DEAD-box ATP-dependent RNA helicase 10                |
|                                         | TRIAE_CS42_2DL_TGACv1_159765_AA0542450 | MAA3         | 1.81                | Up         | Probable helicase MAGATAMA 3                          |
|                                         | TRIAE_CS42_7DL_TGACv1_605009_AA2003770 | Os06g0526600 | 1.01                | Up         | DEAD-box ATP-dependent RNA helicase 31                |
|                                         | TRIAE_CS42_6AL_TGACv1_471618_AA1511850 | Os02g0795900 | 1.00                | Up         | DEAD-box ATP-dependent RNA helicase 1                 |
|                                         | TRIAE_CS42_2AS_TGACv1_114976_AA0370310 | Os07g0647900 | 1.08                | Up         | DEAD-box ATP-dependent RNA helicase 57                |
|                                         | TRIAE_CS42_7DS_TGACv1_625521_AA2065400 | SYD          | 1.75                | Up         | Chromatin structure-remodeling complex protein SYD    |
|                                         | TRIAE_CS42_5BL_TGACv1_404284_AA1293840 | SUV3         | 1.07                | Up         | ATP-dependent RNA helicase SUV3, mitochondrial        |
|                                         | TRIAE_CS42_5DL_TGACv1_433145_AA1403600 | U2AF65A      | 1.07                | Up         | splicing factor U2af large subunit A-like isoform X1  |

|                |                                        |              |      |    |                                                       |
|----------------|----------------------------------------|--------------|------|----|-------------------------------------------------------|
|                | TRIAE_CS42_7DS_TGACv1_622146_AA2033840 | BRR2A        | 1.13 | Up | DExH-box ATP-dependent RNA helicase DExH12            |
|                | TRIAE_CS42_5AL_TGACv1_374601_AA1204150 | WTF9         | 1.01 | Up | Protein WHAT'S THIS FACTOR 9, mitochondrial           |
|                | TRIAE_CS42_6BS_TGACv1_513512_AA1643950 | RBP45        | 1.11 | Up | polyadenylate-binding protein RBP45                   |
|                | TRIAE_CS42_3AL_TGACv1_195115_AA0644960 | mrm1         | 1.22 | Up | Mitochondrial rRNA methyltransferase                  |
|                | TRIAE_CS42_4AS_TGACv1_308103_AA1025890 | At2g16880    | 1.49 | Up | pentatricopeptide repeat-containing protein At2g16880 |
|                | TRIAE_CS42_7BL_TGACv1_578267_AA1892140 | PCMP-E50     | 1.36 | Up | pentatricopeptide repeat-containing protein At2g37320 |
|                | TRIAE_CS42_1DS_TGACv1_081154_AA0258130 | VPS60-1      | 1.71 | Up | Vacuolar protein sorting-associated protein 60.1      |
| DNA activities | TRIAE_CS42_2AL_TGACv1_095939_AA0315910 | dna2         | 1.95 | Up | DNA replication ATP-dependent helicase/nuclease DNA2  |
|                | TRIAE_CS42_4BS_TGACv1_329875_AA1104480 |              | 2.77 | Up | hypothetical protein TRIUR3_05591                     |
|                | TRIAE_CS42_6BS_TGACv1_513549_AA1644650 | JASON        | 1.71 | Up | protein JASON                                         |
|                | TRIAE_CS42_2AL_TGACv1_095202_AA0308280 | LAX2         | 1.63 | Up | Protein LAX PANICLE 2                                 |
|                | TRIAE_CS42_3AL_TGACv1_193661_AA0616880 | At3g10140    | 1.88 | Up | DNA repair protein recA homolog 2, mitochondria       |
|                | TRIAE_CS42_4AS_TGACv1_306214_AA1004350 | RPA1B        | 1.12 | Up | replication protein A 70 kDa DNA-binding subunit B    |
|                | TRIAE_CS42_1BL_TGACv1_031515_AA0115400 | pfh1         | 1.31 | Up | ATP-dependent DNA helicase pfh1                       |
|                | TRIAE_CS42_1BS_TGACv1_049674_AA0159400 | pfh1         | 1.35 | Up | ATP-dependent DNA helicase pfh1                       |
|                | TRIAE_CS42_5BL_TGACv1_405283_AA1324030 | WDHD1        | 1.06 | Up | WD repeat and HMG-box DNA-binding protein 1           |
|                | TRIAE_CS42_6BL_TGACv1_500113_AA1599290 | Os02g0805200 | 1.05 | Up | Proliferating cell nuclear antigen                    |
|                | TRIAE_CS42_3DS_TGACv1_273254_AA0929940 | NTO1         | 1.33 | Up | Mst2 complex subunit nto1                             |
|                | TRIAE_CS42_4AL_TGACv1_289060_AA0964300 | DUT          | 1.87 | Up | deoxyuridine 5'-triphosphate nucleotidohydrolase      |
|                | TRIAE_CS42_4DS_TGACv1_361176_AA1162740 | DUT          | 1.44 | Up | deoxyuridine 6'-triphosphate nucleotidohydrolase      |
|                | TRIAE_CS42_6BS_TGACv1_515830_AA1672640 | SMC6B        | 3.91 | Up | structural maintenance of chromosomes protein 6B      |
|                | TRIAE_CS42_1AL_TGACv1_001426_AA0030330 | BRCA1        | 1.27 | Up | protein BREAST CANCER SUSCEPTIBILITY 1 homolog        |
|                | TRIAE_CS42_2DS_TGACv1_177481_AA0578260 | BARD1        | 1.32 | Up | BRCA1-associated RING domain protein 1                |
|                | TRIAE_CS42_7BL_TGACv1_577187_AA1868260 | FAS2         | 1.04 | Up | Chromatin assembly factor 1 subunit B                 |
|                | TRIAE_CS42_5AL_TGACv1_376504_AA1237740 | FSM          | 1.22 | Up | Chromatin assembly factor 1 subunit FSM               |
|                | TRIAE_CS42_3AL_TGACv1_194491_AA0634010 | TH123        | 1.26 | Up | Histone H2B.6                                         |

|                    |                                        |           |      |    |                                                      |
|--------------------|----------------------------------------|-----------|------|----|------------------------------------------------------|
|                    | TRIAE_CS42_U_TGACv1_640700_AA2069590   | H2B.2     | 1.38 | Up | histone H2B.2                                        |
|                    | TRIAE_CS42_1DL_TGACv1_064141_AA0232850 | hh4       | 1.13 | Up | Histamine H4                                         |
|                    | TRIAE_CS42_2BL_TGACv1_133205_AA0441830 | HMGB6     | 1.70 | Up | high mobility group B protein 6                      |
| Cell cycle         | TRIAE_CS42_U_TGACv1_640835_AA2076520   | STAG1     | 4.34 | Up | Cohesin subunit SA-1                                 |
|                    | TRIAE_CS42_3AL_TGACv1_196057_AA0656880 | SMC2-2    | 1.07 | Up | structural maintenance of chromosomes 2              |
|                    | TRIAE_CS42_5BL_TGACv1_408575_AA1363750 | SYN3      | 1.81 | Up | sister chromatid cohesion 1 protein 3                |
|                    | TRIAE_CS42_5DS_TGACv1_456541_AA1473500 | CYCA3-2   | 1.77 | Up | cyclin-A3-2                                          |
|                    | TRIAE_CS42_7BL_TGACv1_578270_AA1892210 | SYN132    | 1.54 | Up | Syntaxin-132                                         |
|                    | TRIAE_CS42_3AL_TGACv1_193729_AA0618670 | DRP5A     | 1.31 | Up | dynamamin-related protein 5A                         |
|                    | TRIAE_CS42_3B_TGACv1_221031_AA0727440  | DRP5A     | 1.51 | Up | dynamamin-related protein 5A                         |
|                    | TRIAE_CS42_1DL_TGACv1_062802_AA0220170 | MAP65-5   | 1.23 | Up | 65-kDa microtubule-associated protein 5              |
|                    | TRIAE_CS42_4AL_TGACv1_289242_AA0967840 | TPX2      | 1.30 | Up | Protein TPX2                                         |
|                    | TRIAE_CS42_U_TGACv1_642090_AA2111140   | KLC3      | 1.61 | Up | kinesin light chain 3                                |
|                    | TRIAE_CS42_5AS_TGACv1_393918_AA1277190 | KIN14R    | 1.08 | Up | kinesin-like protein KIN-14R                         |
|                    | TRIAE_CS42_7BL_TGACv1_578441_AA1894940 | TUBB1     | 1.28 | Up | Tubulin beta-1 chain                                 |
|                    | TRIAE_CS42_7BS_TGACv1_592328_AA1935710 | RAC4      | 1.33 | Up | putative small GTP-binding protein                   |
|                    | TRIAE_CS42_1BL_TGACv1_030848_AA0102230 | NET2A     | 2.38 | Up | protein NETWORKED 2A                                 |
|                    | TRIAE_CS42_3B_TGACv1_222970_AA0774390  | XI-K      | 1.51 | Up | Myosin-17                                            |
| Cell proliferation | TRIAE_CS42_6AL_TGACv1_471715_AA1513370 | HIP1      | 1.76 | Up | Probable E3 ubiquitin-protein ligase HIP1            |
|                    | TRIAE_CS42_5AL_TGACv1_375628_AA1224770 | At3g07870 | 3.21 | Up | F-box protein At1g47340 isoform X1                   |
|                    | TRIAE_CS42_2DL_TGACv1_159374_AA0537360 | TIF3I1    | 3.40 | Up | Eukaryotic translation initiation factor 3 subunit I |
|                    | TRIAE_CS42_5AL_TGACv1_378415_AA1253190 | At3g07870 | 1.43 | Up | F-box protein At3g07870                              |



**Supplementary Table S7 The DEGs related to ion uptake and transport, disease resistance, and abiotic stress resistance under N-deficiency stress**

| Group                    | Gene ID                                | Gene_symbol  | log <sub>2</sub> FC | Regulation | Description                              |
|--------------------------|----------------------------------------|--------------|---------------------|------------|------------------------------------------|
| Ion uptake and transport | TRIAE_CS42_3DL_TGACv1_249328_AA0845500 | NPF1.2       | 1.21                | Up         | protein NRT1/ PTR FAMILY 1.2             |
|                          | TRIAE_CS42_4DL_TGACv1_346114_AA1155110 | NPF1.2       | 1.79                | Up         | protein NRT1/ PTR FAMILY 1.2             |
|                          | TRIAE_CS42_4BL_TGACv1_320961_AA1052590 | SULTR1;2     | 1.87                | Up         | sulfate transporter 1.2                  |
|                          | TRIAE_CS42_4AS_TGACv1_308266_AA1027080 | Atlg04770    | 1.01                | Up         | protein SULFUR DEFICIENCY-INDUCED 2      |
|                          | TRIAE_CS42_5BS_TGACv1_423795_AA1383420 | BOR2         | 1.18                | Up         | probable boron transporter 2             |
|                          | TRIAE_CS42_2AS_TGACv1_113103_AA0351270 | CCC2         | 1.48                | Up         | cation-chloride cotransporter 2          |
|                          | TRIAE_CS42_2AL_TGACv1_093880_AA0288690 | COPT6        | 1.63                | Up         | copper transporter 6                     |
|                          | TRIAE_CS42_3DS_TGACv1_274537_AA0936010 | SLAH1        | -1.52               | Down       | S-type anion channel SLAH1               |
|                          | TRIAE_CS42_7BS_TGACv1_592974_AA1946890 | PHO1-3       | -2.67               | Down       | phosphate transporter PHO1-3             |
| Disease resistance       | TRIAE_CS42_3B_TGACv1_221653_AA0746670  | TPK1         | -1.04               | Down       | two-pore potassium channel 1             |
|                          | TRIAE_CS42_1DL_TGACv1_061518_AA0197540 | RGA2         | 1.07                | Up         | disease resistance protein RGA2          |
|                          | TRIAE_CS42_2AS_TGACv1_115149_AA0371220 | RGA3         | 1.27                | Up         | putative disease resistance protein RGA3 |
|                          | TRIAE_CS42_1BL_TGACv1_031662_AA0118230 | RGA3         | 3.15                | Up         | putative disease resistance protein RGA3 |
|                          | TRIAE_CS42_6BS_TGACv1_513906_AA1651870 | RGA4         | Inf                 | Up         | disease resistance protein RGA4          |
|                          | TRIAE_CS42_7AL_TGACv1_557829_AA1786770 | RGA5         | 1.04                | Up         | disease resistance protein RGA5          |
|                          | TRIAE_CS42_6BS_TGACv1_515091_AA1667200 | RPM1         | 2.87                | Up         | disease resistance protein RPM1          |
|                          | TRIAE_CS42_1DS_TGACv1_080256_AA0244390 | RPM1         | 1.31                | Up         | disease resistance protein RPM1          |
|                          | TRIAE_CS42_4AL_TGACv1_289054_AA0964150 | RPP13        | Inf                 | Up         | disease resistance protein RPP13         |
|                          | TRIAE_CS42_5AL_TGACv1_376140_AA1232660 | RPP13        | 2.77                | Up         | disease resistance protein RPP13         |
|                          | TRIAE_CS42_U_TGACv1_640791_AA2074530   | MLO13        | 1.06                | Up         | MLO-like protein 13                      |
|                          | TRIAE_CS42_3DS_TGACv1_274058_AA0934550 | Os05g0277500 | Inf                 | Up         | germin-like protein 5-1                  |

|                              |                                        |           |       |      |                                                       |
|------------------------------|----------------------------------------|-----------|-------|------|-------------------------------------------------------|
|                              | TRIAE_CS42_2DL_TGACv1_157957_AA0503480 |           | 1.11  | Up   | antimicrobial peptides                                |
|                              | TRIAE_CS42_1DS_TGACv1_080301_AA0245590 | RPP13     | -3.70 | Down | disease resistance protein RPP13                      |
|                              | TRIAE_CS42_7DL_TGACv1_604258_AA1995960 | RPP13     | -1.21 | Down | disease resistance protein RPP13                      |
|                              | TRIAE_CS42_7BL_TGACv1_578155_AA1890310 | RPM1      | -1.21 | Down | Disease resistance protein RPM1                       |
|                              | TRIAE_CS42_2DL_TGACv1_161538_AA0559080 | DMR6      | inf   | Down | Protein DOWNY MILDEW RESISTANCE 6                     |
|                              | TRIAE_CS42_5DS_TGACv1_457075_AA1481960 | WIR1A     | -4.33 | Down | protein WIR1A                                         |
| Abiotic stress<br>resistance | TRIAE_CS42_5DL_TGACv1_433368_AA1411070 | RZ1A      | 1.01  | Up   | glycine-rich RNA-binding protein RZ1A                 |
|                              | TRIAE_CS42_7BL_TGACv1_578754_AA1899590 | SRC2      | 1.27  | Up   | protein SRC2 homolog                                  |
|                              | TRIAE_CS42_3DL_TGACv1_253971_AA0895810 | LOS1      | 1.86  | Up   | elongation factor 2                                   |
|                              | TRIAE_CS42_2AL_TGACv1_093460_AA0280570 | LTL1      | 1.30  | Up   | GDSL esterase/lipase LTL1                             |
|                              | TRIAE_CS42_1DL_TGACv1_061644_AA0200730 | At3g50940 | 2.22  | Up   | AAA-ATPase At3g50940                                  |
|                              | TRIAE_CS42_5AL_TGACv1_375039_AA1214550 | BPM3      | 1.63  | Up   | BTB/POZ and MATH domain-containing protein 3          |
|                              | TRIAE_CS42_3DL_TGACv1_249544_AA0851310 | BPM1      | 1.66  | Up   | BTB/POZ and MATH domain-containing protein 1          |
|                              | TRIAE_CS42_1BL_TGACv1_033050_AA0136450 | LSU2      | 1.57  | Up   | protein RESPONSE TO LOW SULFUR 2                      |
|                              | TRIAE_CS42_1AL_TGACv1_001888_AA0036300 | IRL       | 1.52  | Up   | isoflavone reductase homolog IRL                      |
|                              | TRIAE_CS42_4BS_TGACv1_328221_AA1084870 | ZIFL1     | 2.07  | Up   | protein ZINC INDUCED FACILITATOR-LIKE 1               |
|                              | TRIAE_CS42_5BL_TGACv1_406491_AA1346180 | FTSH5     | 4.16  | Up   | ATP-dependent zinc metalloprotease FTSH 5             |
|                              | TRIAE_CS42_2DS_TGACv1_179008_AA0603420 | HIPP27    | 1.13  | Up   | heavy metal-associated isoprenylated plant protein 27 |
|                              | TRIAE_CS42_6BL_TGACv1_502797_AA1626460 | HIPP05    | 2.11  | Up   | heavy metal-associated isoprenylated plant protein 5  |
|                              | TRIAE_CS42_2AS_TGACv1_112831_AA0345900 | RDUF1     | -2.29 | Down | E3 ubiquitin-protein ligase RDUF1                     |
|                              | TRIAE_CS42_2BS_TGACv1_148173_AA0491160 | RDUF1     | -2.20 | Down | E3 ubiquitin-protein ligase RDUF1                     |
|                              | TRIAE_CS42_2DS_TGACv1_177260_AA0571040 | RDUF1     | -2.42 | Down | E3 ubiquitin-protein ligase RDUF1                     |
|                              | TRIAE_CS42_6DL_TGACv1_527070_AA1698080 | RHA2A     | -1.13 | Down | E3 ubiquitin-protein ligase RHA2A                     |
|                              | TRIAE_CS42_2BL_TGACv1_129831_AA0397480 | BPM1      | Inf   | Down | BTB/POZ and MATH domain-containing protein 1          |

**Table S9. The DEGs associated with phytohormones, transcription factors, and protein kinases under N-deficiency stress**

| Group                                               | Gene ID                                | Gene_symbol | Log <sub>2</sub> FC | Regulation | Description                                              |
|-----------------------------------------------------|----------------------------------------|-------------|---------------------|------------|----------------------------------------------------------|
| Ethylene (ETH)                                      | TRIAE_CS42_1BL_TGACv1_030266_AA0084590 | CRF6        | -2.14               | Down       | ethylene responsive transcription factor CRF6            |
|                                                     | TRIAE_CS42_6DL_TGACv1_527023_AA1697360 | ERF054      | -1.32               | Down       | ethylene-responsive transcription factor ERF054          |
|                                                     | TRIAE_CS42_1AL_TGACv1_000814_AA0019580 | ERF061      | -1.29               | Down       | ethylene-responsive transcription factor ERF061          |
|                                                     | TRIAE_CS42_5BL_TGACv1_406063_AA1340110 | ERF109      | -2.52               | Down       | ethylene-responsive transcription factor ERF109          |
|                                                     | TRIAE_CS42_7AS_TGACv1_569159_AA1808800 | RAP2-4      | -1.09               | Down       | ethylene-responsive transcription factor RAP2-4          |
|                                                     | TRIAE_CS42_7BS_TGACv1_593422_AA1951390 | RAP2-4      | -1.28               | Down       | ethylene-responsive transcription factor RAP2-4          |
|                                                     | TRIAE_CS42_U_TGACv1_642197_AA2113160   | RAP2-12     | -2.24               | Down       | ethylene-responsive transcription factor RAP2-12         |
| Aminocyclopropane-1-carboxylate (ACC) oxidase (ACO) | TRIAE_CS42_3AL_TGACv1_194843_AA0640520 | At1g06620   | -1.50               | Down       | 1-aminocyclopropane-1-carboxylate oxidase-like protein 1 |
| auxin (IAA)                                         | TRIAE_CS42_2AL_TGACv1_093659_AA0284740 | ARF11       | 1.73                | Up         | auxin response factor 11                                 |
|                                                     | TRIAE_CS42_U_TGACv1_640819_AA2075640   | PIN9        | 4.51                | Up         | probable auxin efflux carrier component 9                |
| Cytokinin (CTK)                                     | TRIAE_CS42_1AL_TGACv1_002153_AA0039220 | CKX3        | 1.39                | Up         | cytokinin dehydrogenase activity                         |
| Transcription factors (TFs)                         | TRIAE_CS42_1BL_TGACv1_031111_AA0108070 | pif1        | 1.52                | Up         | transcription factor PIF1, bHLH family                   |
|                                                     | TRIAE_CS42_5BS_TGACv1_423322_AA1374250 | FRS5        | 1.14                | Up         | protein FAR1-RELATED SEQUENCE 5, FAR family              |
|                                                     | TRIAE_CS42_6DS_TGACv1_542484_AA1721940 | FRS5        | 1.13                | Up         | protein FAR1-RELATED SEQUENCE 5, FAR family              |

|                                                |                                        |           |      |    |                                                        |
|------------------------------------------------|----------------------------------------|-----------|------|----|--------------------------------------------------------|
|                                                | TRIAE_CS42_5AL_TGACv1_379331_AA1256080 | TIFY10C   | 2.38 | Up | protein TIFY 10c, TIFY family                          |
|                                                | TRIAE_CS42_5DL_TGACv1_436873_AA1463710 | TIFY10C   | 1.59 | Up | protein TIFY 10c, TIFY family                          |
| Serine threonine-protein kinase (STK)          | TRIAE_CS42_5BL_TGACv1_406098_AA1340730 | PBL9      | 1.47 | Up | serine/threonine-protein kinase PBL9 isoform X2        |
|                                                | TRIAE_CS42_U_TGACv1_645180_AA2143400   | PIX13     | 1.75 | Up | serine/threonine-protein kinase PIX13                  |
|                                                | TRIAE_CS42_5BS_TGACv1_424668_AA1391180 | KIPK1     | 1.35 | Up | serine/threonine-protein kinase KIPK                   |
|                                                | TRIAE_CS42_3AS_TGACv1_212415_AA0700700 | RIO1      | 1.07 | Up | serine/threonine-protein kinase RIO1-like              |
| Wall-associated receptor kinase (WRK)          | TRIAE_CS42_6AL_TGACv1_471593_AA1511550 | WAK5      | 1.98 | Up | wall-associated receptor kinase 5                      |
|                                                | TRIAE_CS42_6DS_TGACv1_543020_AA1734220 | WAK5      | 1.02 | Up | wall-associated receptor kinase 5                      |
|                                                | TRIAE_CS42_1BS_TGACv1_050512_AA0172930 | WAK2      | 1.15 | Up | wall-associated receptor kinase 5                      |
|                                                | TRIAE_CS42_5AL_TGACv1_374728_AA1207650 | WAK5      | 1.67 | Up | wall-associated receptor kinase 5                      |
| Leucine-rich repeat receptor like kinase (LRR) | TRIAE_CS42_2DS_TGACv1_179217_AA0605290 | PEPR1     | 1.19 | Up | LRR receptor-like protein kinase PEPR2                 |
|                                                | TRIAE_CS42_6BS_TGACv1_514747_AA1663930 | At1g35710 | 1.65 | Up | LRR receptor-like protein kinase At1g35710             |
|                                                | TRIAE_CS42_7AS_TGACv1_570917_AA1842360 | GSO1      | Inf  | Up | LRR receptor-like serine/threonine-protein kinase GSO1 |
| Histidine kinase (HK)                          | TRIAE_CS42_5BL_TGACv1_404843_AA1312530 | mak2      | 3.92 | Up | peroxide stress-activated histidine kinase mak2        |
|                                                | TRIAE_CS42_7BL_TGACv1_578745_AA1899500 | AHK1      | 2.00 | Up | histidine kinase 1                                     |
